# Supplementary material for: Comparator Data Characteristics and Testing Procedures for the Clinical Performance Evaluation of Continuous Glucose Monitoring Systems
Source: PubMed Central journal article supplement (PMC10979680; doi:10.1089/dia.2023.0465), 2024-03-28
Supplement: Supplementary_Data.pdf [file Supplementary_Data.pdf]

## Supplemental Materials

### Additional information on the analysis of real-world data

#### Studies and datasets

**Table S 1:** Detailed information on the publicly available datasets used in the article.

|                                                                                   | <i>REPLACE-BG</i> <sup>52,56</sup> | <i>SENCE</i> <sup>55,56</sup>   | <i>CITY</i> <sup>53,56</sup>    | <i>WISDM</i> <sup>54,56</sup>    | <i>DCLP3</i> <sup>4,56</sup>  | <i>All</i>                     |
|-----------------------------------------------------------------------------------|------------------------------------|---------------------------------|---------------------------------|----------------------------------|-------------------------------|--------------------------------|
| <b>Number of participants</b> with CGM data                                       | 226                                | 144                             | 153                             | 206                              | 168                           | 897                            |
| <b>Age</b> [years]<br>Median (IQD*)<br>[Min, Max]                                 | 43 (24)<br>[19,78]                 | 5 (3)<br>[2,7]                  | 17 (5)<br>[14,24]               | 67 (7)<br>[60,86]                | 28 (28)<br>[14,71]            | 31 (45)<br>[2,86]              |
| <b>HbA1c</b> at screening [%]<br>Median (IQD*)<br>[Min, Max]                      | 7.3 (1.0)<br>[5.2,8.9]             | 8.2 (1.1)<br>[7.0,9.9]          | 9.1 (1.7)<br>[7.5,10.9]         | 7.5 (1.3)<br>[5.4,10.0]          | 7.5 (1.2)<br>[5.5,11.3]       | 7.8 (1.4)<br>[5.2,11.3]        |
| <b>Total duration</b> of CGM data [days]                                          | 51414.7                            | 30152.0                         | 28942.4                         | 37477.9                          | 31361.9                       | 179349.0                       |
| <b>Duration</b> of CGM data per participant [days]<br>Median (IQD*)<br>[Min, Max] | 230.6 (33.2)<br>[56.5,326.7]       | 200.7<br>(165.9)<br>[7.8,466.2] | 184.6<br>(133.0)<br>[7.6,381.7] | 177.6<br>(103.1)<br>[12.5,425.5] | 189.6 (10.1)<br>[125.8,200.5] | 194.2<br>(69.0)<br>[7.6,466.2] |
| <b>CGM system</b>                                                                 | Dexcom G4<br>505                   | Dexcom G5<br>Mobile             | Dexcom G5                       | Dexcom G5                        | Dexcom G6                     | -                              |

\* IQD: interquartile distance, i.e., difference between 75<sup>th</sup> and 25<sup>th</sup> percentiles

#### Data processing

The data recording interval was 5 minutes in all datasets and CGM values were provided as integers in mg/dL. Data from each subject was analyzed separately. To identify hypoglycemia episodes of interest, the following procedure was applied:

1. Identify all phases, where between 3 (15 min) and 24 (120 min) consecutive CGM glucose levels are <70 mg/dL (3.9 mmol/L). Any phases longer than 120 min are likely caused by artifacts and thus excluded.
2. Extend the phases identified in step 1 with the 12 preceding data points (60 min), forming the potential hypoglycemic episodes of interest.
3. Discard any potential hypoglycemic episodes of interest if:
  - a. Any recording interval was not 5 minutes.

- b. The absolute value of any CGM rate of change (RoC) was  $>5$  mg/dL/min (0.28 mmol/L/min).
- c. The preceding data contained CGM glucose levels  $<70$  mg/dL (3.9 mmol/L).
- d. The preceding data contained CGM RoCs  $>0$ .

To identify hyperglycemia episodes of interest, the following procedure was applied:

1. Identify all phases, where 3 (15 min) or more consecutive CGM glucose levels are  $>250$  mg/dL (13.9 mmol/L).
2. Extended the phases identified in step 1 with the 12 preceding data points (60 min), forming the potential hyperglycemic episodes of interest.
3. Discard any potential hyperglycemic episodes of interest if:
  - a. Any recording interval was not 5 minutes.
  - b. The absolute value of any CGM rate of change (RoC) was  $>5$  mg/dL/min (0.28 mmol/L/min).
  - c. The preceding data contained CGM glucose levels  $>250$  mg/dL (13.9 mmol/L)
  - d. The preceding data contained CGM RoCs  $<0$ .

The CGM RoC-glucose level traces shown in Figure 3b and 3d in the main text were calculated as follows:

1. Take the 13 consecutive CGM data points (60 min) including the first hypo-/hyperglycemic data point.
2. Fit a univariate spline function of degree 3 and smoothing factor 2 using the Python package *scipy.interpolate.UnivariateSpline*.
3. Use the fitted spline function to calculate an interpolated CGM trace of length 101.
4. Calculate the numeric derivative of the interpolated CGM trace to obtain the corresponding RoC curve and discard the first value of the interpolated CGM trace.

### Additional results

The results of analyzing the individual datasets analogous to Figure 3 in the main text are shown below.

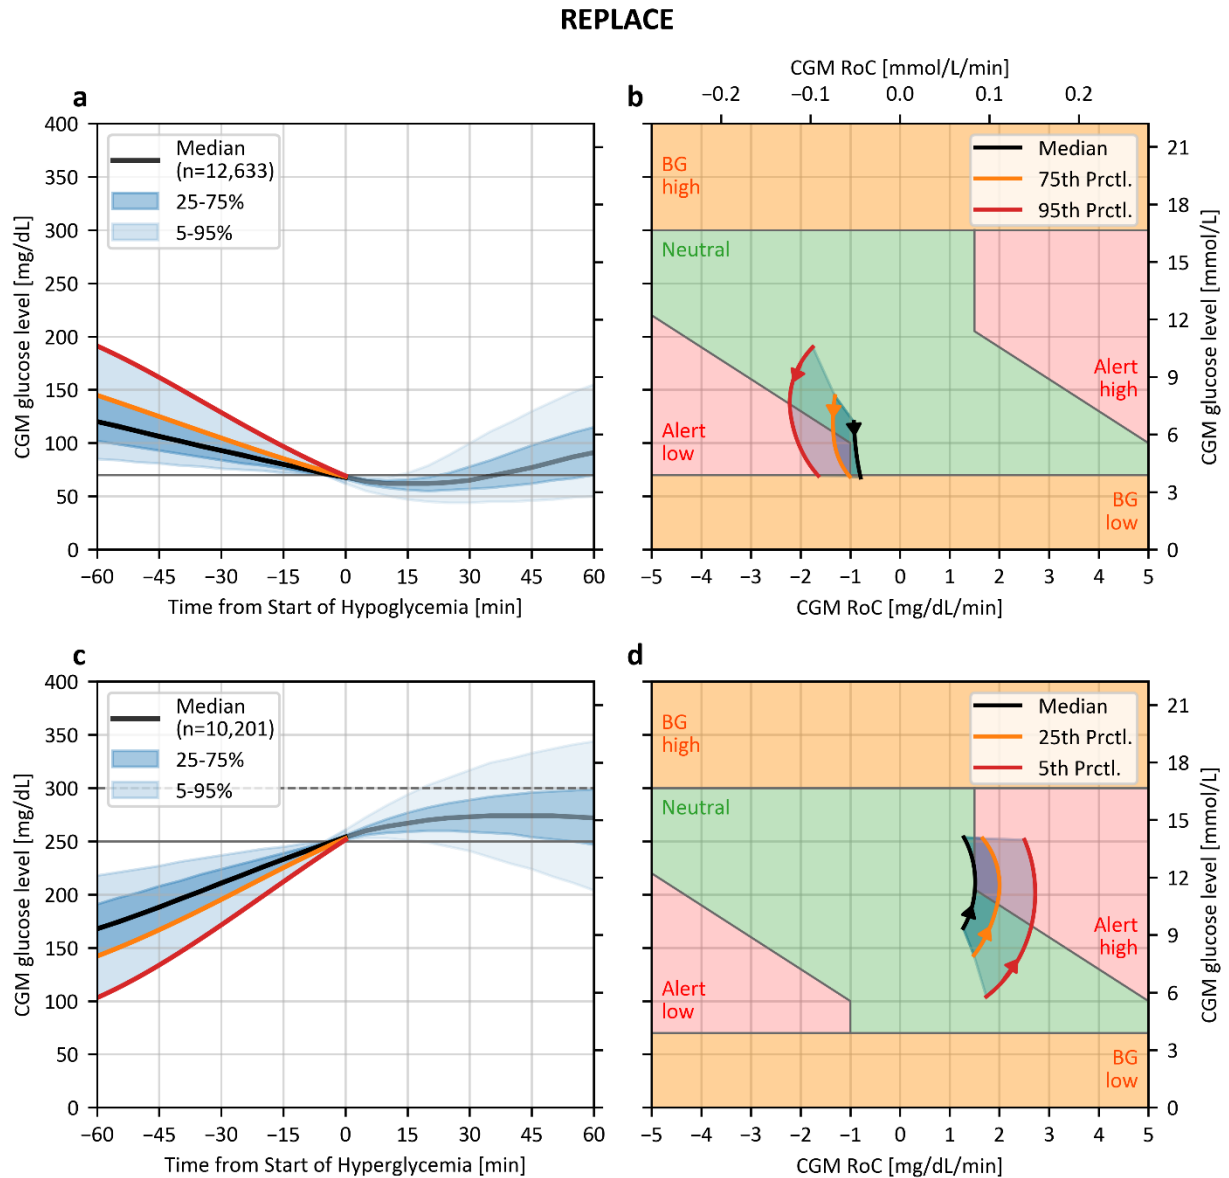

**Figure S 1:** Results of analyzing the REPLACE-BG dataset, analogous to Figure 3 in the main text.

## SENCE

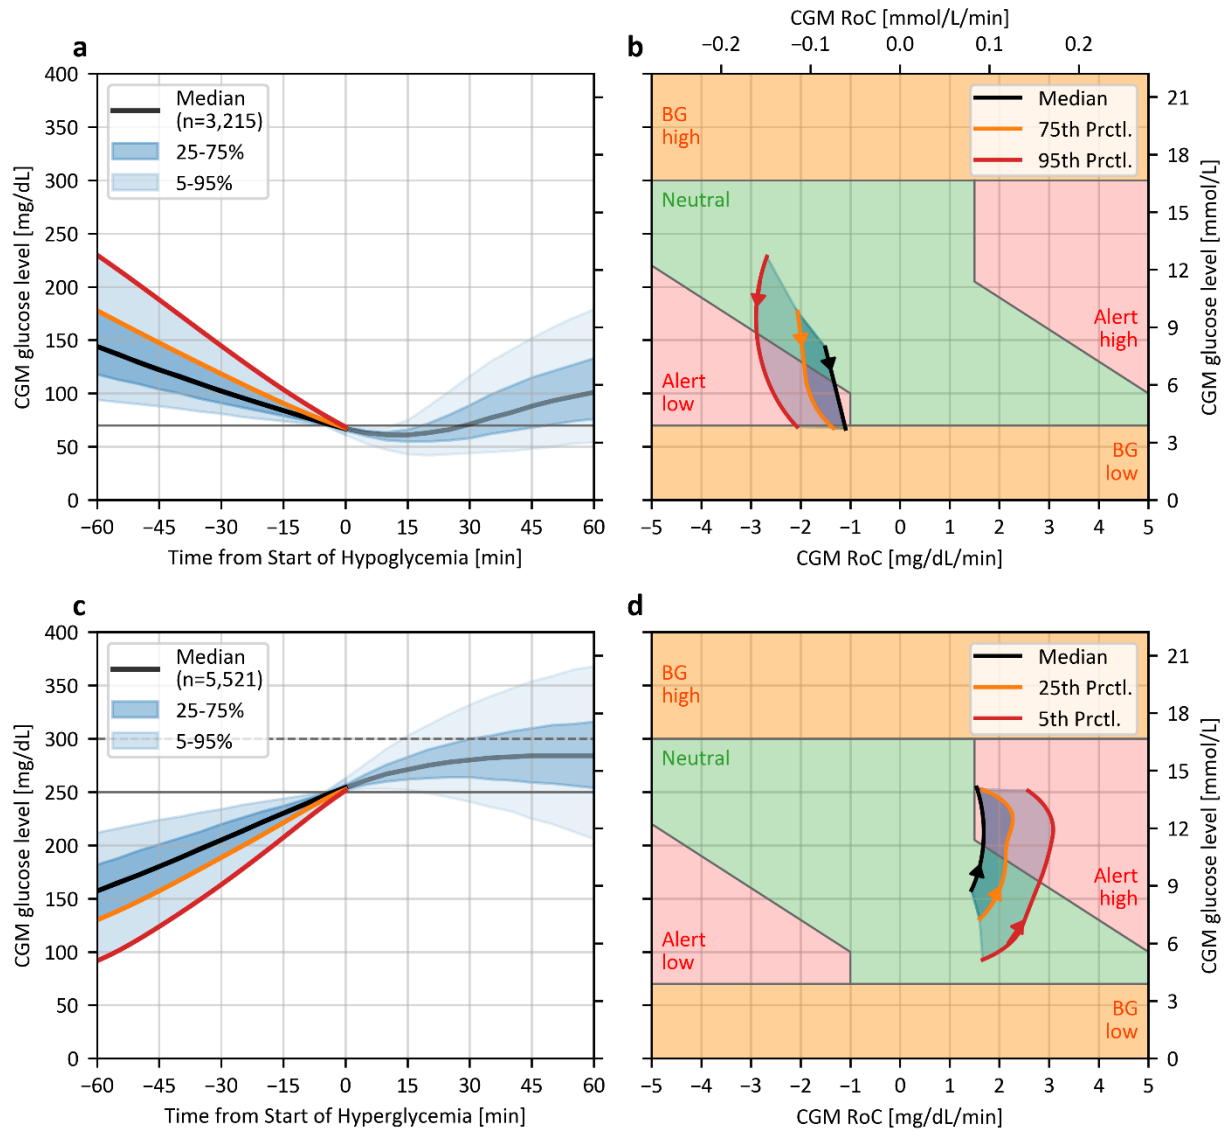

**Figure S 2:** Results of analyzing the SENCE dataset, analogous to Figure 3 in the main text.

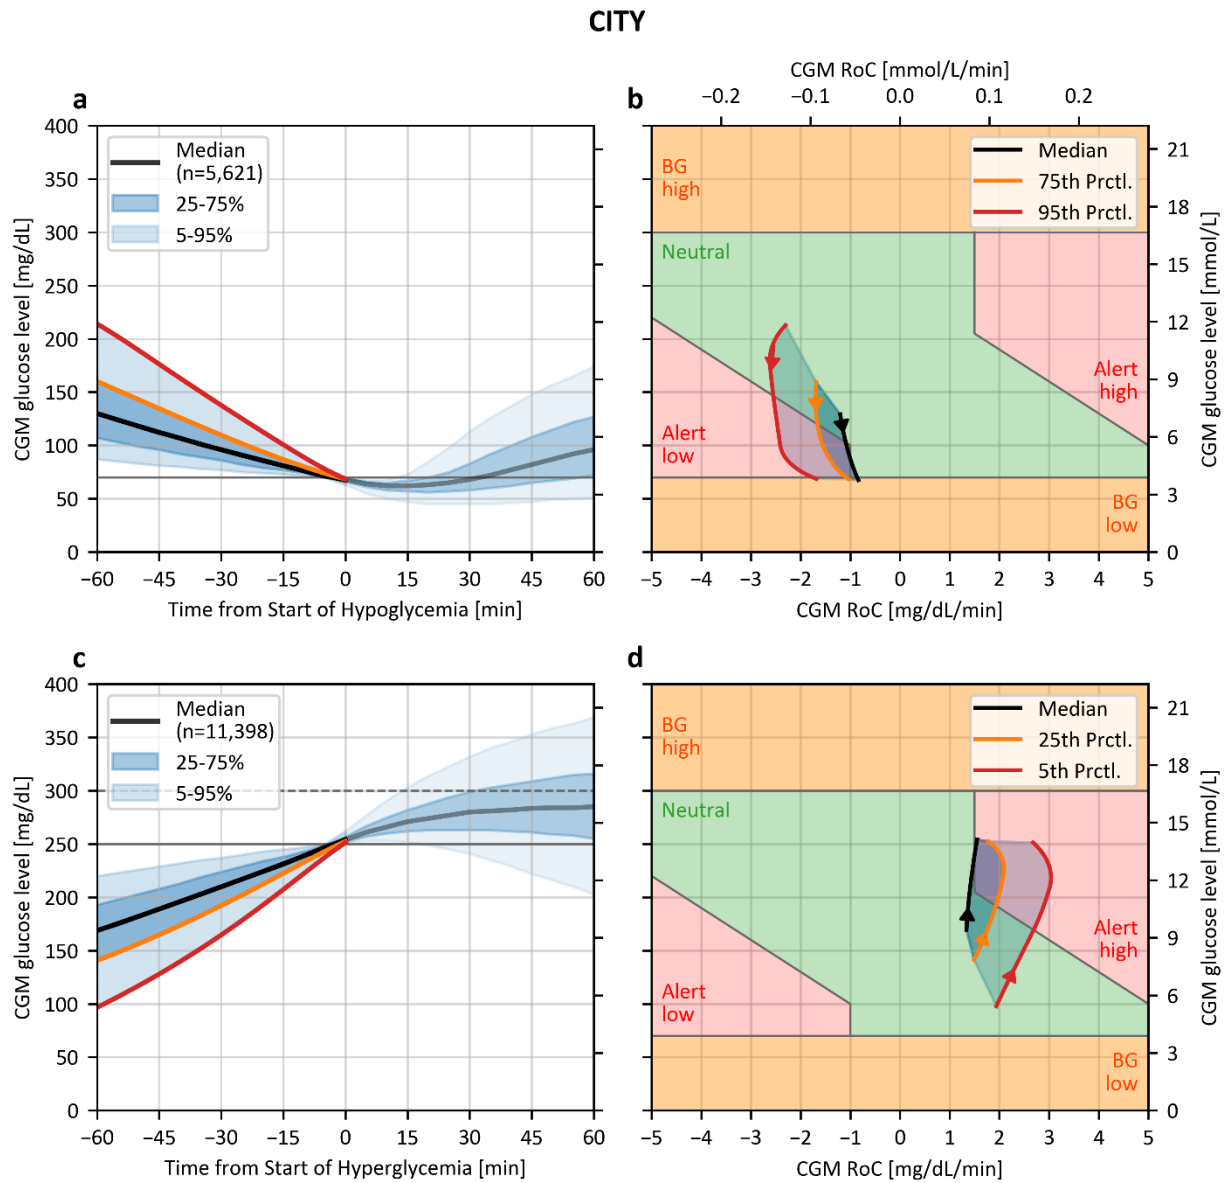

**Figure S 3:** Results of analyzing the CITY dataset, analogous to Figure 3 in the main text.

## WISDM

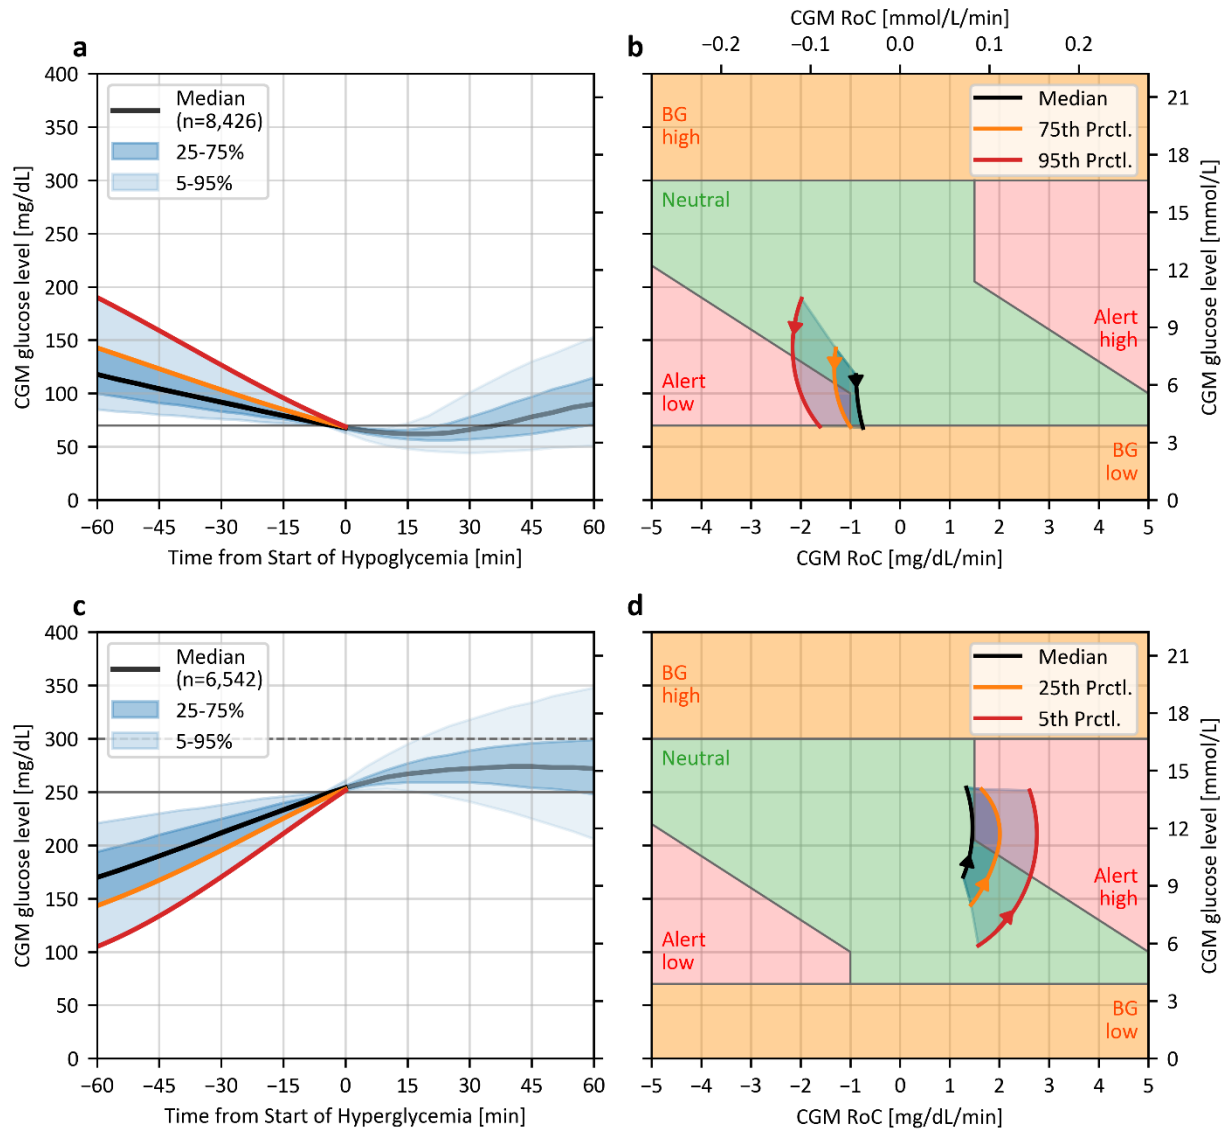

**Figure S 4:** Results of analyzing the WISDM dataset, analogous to Figure 3 in the main text.

DCLP3

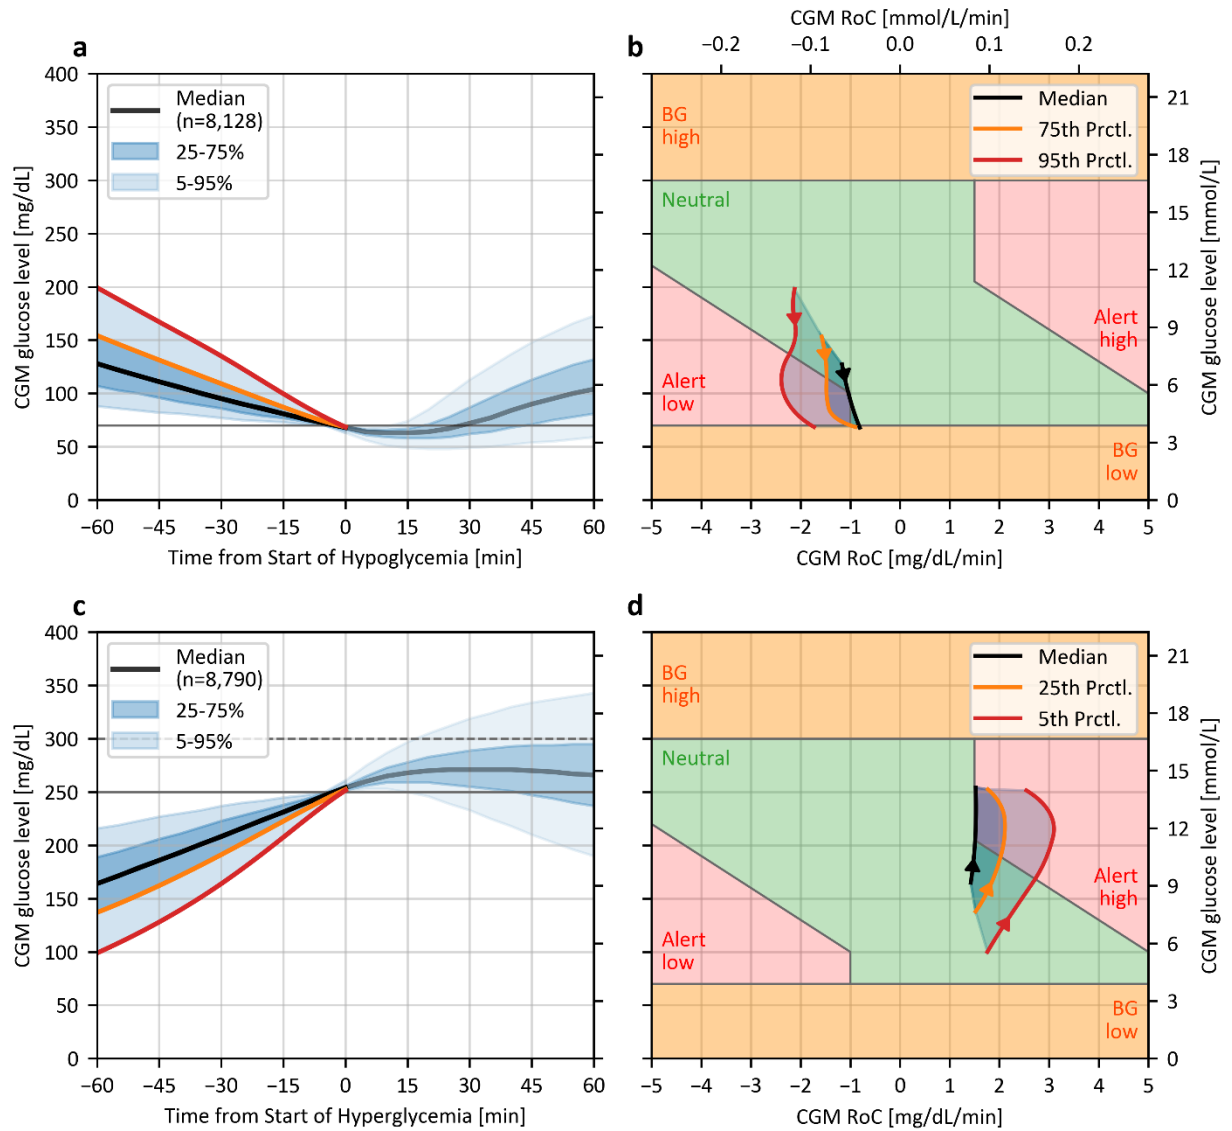

**Figure S 5:** Results of analyzing the DCLP3 dataset, analogous to Figure 3 in the main text.
